# Supplementary material for: Amyloid-β plaque formation and reactive gliosis are required for induction of cognitive deficits in App knock-in mouse models of Alzheimer’s disease
Source: PubMed Central journal article supplement (PMC6425634; doi:10.1186/s12868-019-0496-6), 2019-03-20
Supplement: 12868_2019_496_MOESM1_ESM.pdf [file 12868_2019_496_MOESM1_ESM.pdf]

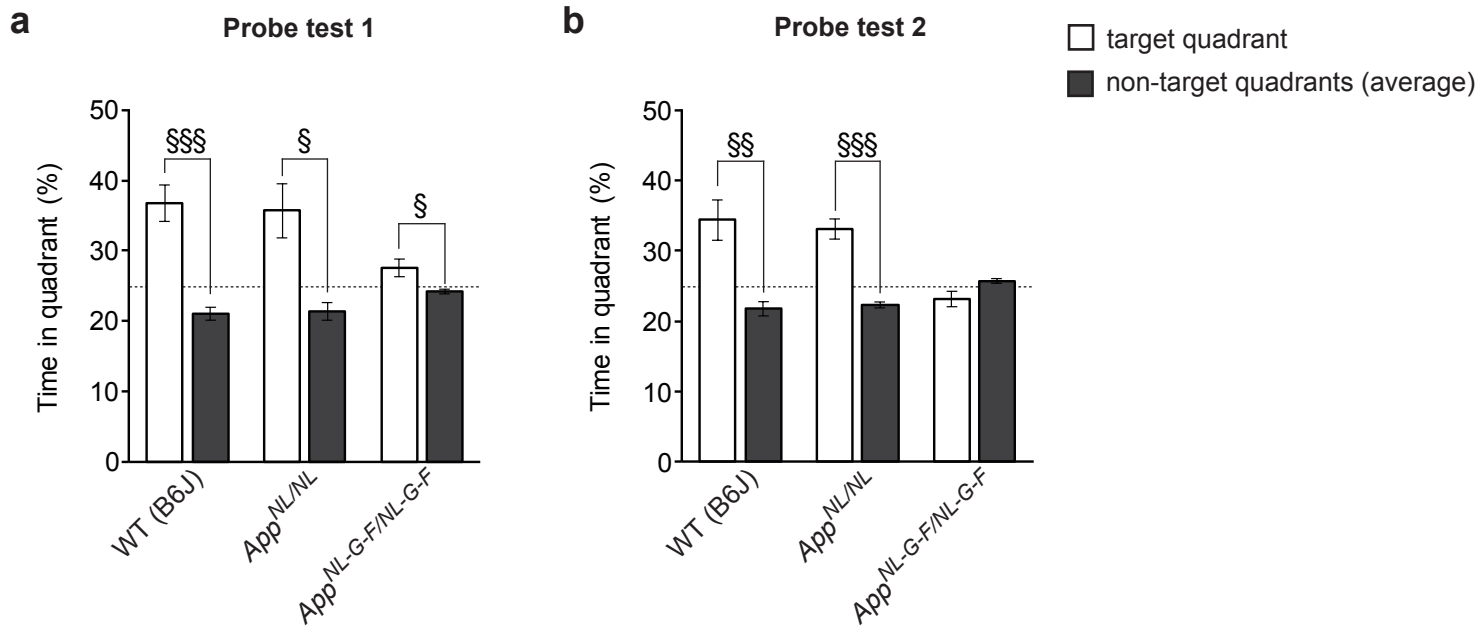

Fig. S1
